# Supplementary material
Source: PubMed Central journal article supplement (PMC5758445)
Supplement: NIHMS893258-supplement.pdf [file NIHMS893258-supplement.pdf]

# Toolbox Readme

March 29, 2017

Toolbox accompanying “Dynamic Graph Metrics: Tutorial, Toolbox, and Tale” by Ann E. Sizemore & Danielle S. Bassett (2017). Submitted.

## Visualization tools

*plotDNline* Plots the dynamic network given by *contactSequence* with *nNodes* nodes and exists within the interval *timeInterval*. Example shown in Fig. 1. Node colors chosen randomly. Best for networks where only one contact occurs at each timepoint.

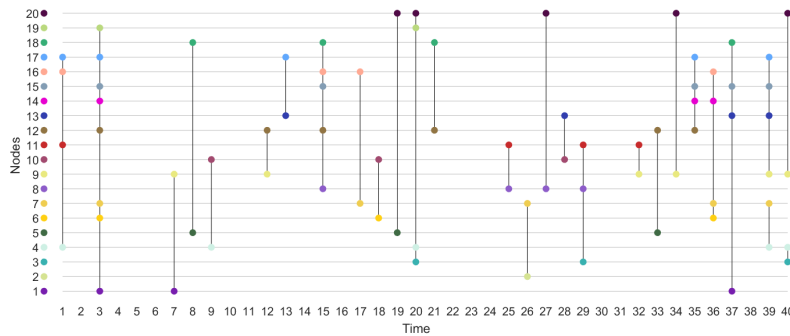

Figure 1: Plot of dynamic network using plotDNline.

*plotDNarc* Plots the dynamic network given by *contactSequence* with *nNodes* nodes and exists within the interval *timeInterval*. Example shown in Fig. 2. Node colors chosen randomly. Recommended for generally sparse networks with fewer than 50 nodes.

*plotDNarc\_dir* Plots the directed dynamic network given by *contactSequence* with *nNodes* nodes and exists within the interval *timeInterval*. Example shown in Fig. 3. Node colors chosen randomly. Recommended for generally sparse networks with fewer than 50 nodes.

*plotArcNetwork* Plots a weighted, undirected network along a circle with edges shown as arcs.

## Models

*randomDN* Creates a random dynamic network on *nNodes* nodes with *nEdges* total connections. Nodes are randomly connected and contact times chosen randomly from *edgeTimes*. Self-connections are not allowed.

*ringDN* Creates a dynamic network in a ring structure on *nNodes* nodes. Edges connect adjacent nodes in ascending order at linearly spaced times in the interval *timeInterval*.

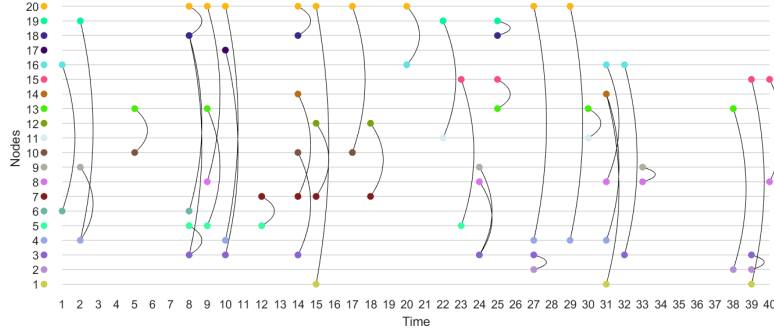

Figure 2: Plot of dynamic network using plotDNarc.

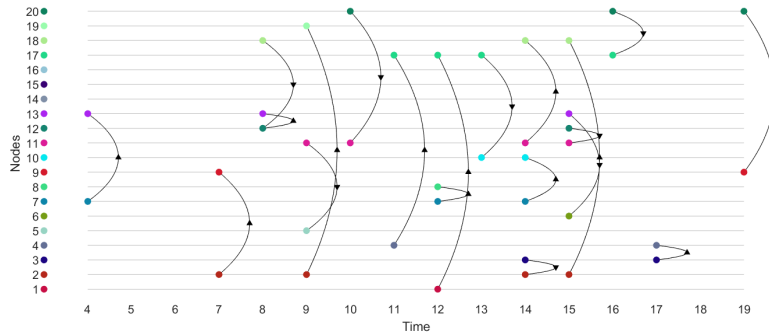

Figure 3: Plot of directed dynamic network using plotDNarc\_dir.

*randomizedEdges* Given a dynamic network as *contactSequence*, visit each edge and rewire it to a randomly chosen node while keeping the time of contact the same.

*randomPermutedTimes* Given a dynamic network as *contactSequence*, permute all contact times.

*shuffledTimeSteps* Thinking of the dynamic network as a sequence of graphs  $G_1, G_2, \dots, G_T$ , shuffle the order of the graphs in this sequence to return a randomized dynamic network.

## Dynamic graph metrics

*betweennessCentrality* Given a *contactSequence*, calculate the betweenness centrality  $C_B(i, t) = \sum_{i \neq j \neq k} \frac{\sigma_{j,k}(i, t)}{\sigma_{j,k}(t)}$  for  $\sigma_{j,k}(i, t)$  the number of shortest paths from  $j$  to  $k$  which pass through node  $i$  beginning no earlier than time  $t$ .

*burstiness* Given input vector, calculate the burstiness. As defined in Holme, Samaraki 2011, the burstiness of a vector  $v$  is  $B = \frac{\sigma_v - m_v}{\sigma_v + m_v}$  with  $\sigma_v$  and  $m_v$  the standard deviation and mean, respectively, of  $v$ . This code also outputs the coefficient of variation.

*closenessCentrality* Given an initial node  $i$  and time, compute the closeness centrality  $C_C(i, t) = \frac{1}{N-1} \sum_{i \neq j} \frac{1}{\tau(i, j, t)}$ . This function also returns the vector *tau\_vec* recording  $\tau(i, j, t)$  for each node  $j$ .

*forwardLatency* Given an initial and final node (*node\_i* and *node\_j*), along with a starting *time*, return the next time at which node  $j$  could be contacted by node  $i$  ( $\tau_{i,t}(j)$ ).

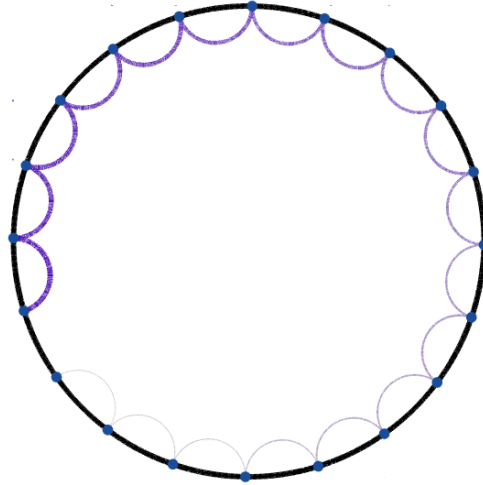

Figure 4: Plot of ring dynamic network time-aggregate graph using plotArcNetwork.

*informationLatency* Given a particular moment in time, this function returns the most recent point at which *node\_i* received information from *node\_j* ( $\phi_{i,t}(j)$ ) in addition to the information latency  $\lambda_{i,t}(j) = t - \phi_{i,t}(j)$ .

*informationView* Calculate node *i*'s view of node *j*'s information at a particular time *t*.

*isStrongly(Weakly)Connected* Determine if nodes *node\_i*, *node\_j* are strongly (weakly) connected.

*latency* Returns the latency for node pair *node\_i*, *node\_j*, calculated using *latencyComputations*. At the first moment the latency is minimal, this function also returns the path length (number of edges in this minimal time path) and last contact time (time at which this path was completed).

*listAllMotifs* Return all unique paths within the dynamic network. Very memory intensive, not recommended for large/dense dynamic networks.

*reachabilityAtTimeT* Creates a binary network describing which nodes are connected at time *t* in the dynamic network encoded by *contactSequence*.

*setOfInfluence* Determine the nodes reachable from node *node\_i* via time-respecting paths beginning at time *t\_i* or later.

*sourceSet* Determine set of nodes from which node *node\_i* can be reached via time-respecting paths beginning at time *t\_i* or later.

*temporalCorrelation* For a *contactSequence*, calculate the temporal correlation coefficient for each node, defined  $C_i = \frac{1}{T-1} \sum_{t=1}^{T-1} \frac{\sum_j A_{i,j}(t)A_{i,j}(t+1)}{\sqrt{[\sum_j A_{i,j}(t)][\sum_j A_{i,j}(t+1)]}}$ .

*temporalSmallWorldness* Given a *contactSequence*, calculate the temporal characteristic path length and temporal correlation coefficient.

## Other helpful functions

*arrayToContactSeq* For a network stored in an  $nNodes \times nNodes \times timePoints$  array, convert to contact sequence. Takes binary or weighted networks.

*forwardLatencyComputaitons* Output additional arrays recording latency, path length, and last contact information given a *contactSequence* and pair of nodes.

*latencyComputations* Calculate latency, path length, and time since last contact for all node pairs at each possible contact time. Returns three  $nNodes \times nNodes \times nContactTimes$  arrays with this information recorded. Optionally input a vector *interval* with start and end times for a windowed calculation. Currently the memory is infinite, so a node can hold information for any amount of time.

*makeReachabilityArray* Construct a  $nNodes \times nNodes \times \text{---contactTimes---}$  array recording if node  $j$  can be reached from node  $i$  via time-respecting paths by time  $t$ . Can use either directed or undirected dynamic networks.

*reachabilityGraph* Construct a  $nNodes \times nNodes$  graph recording if node  $j$  can be reached from node  $i$  via time-respecting paths at anytime. Can use either directed or undirected dynamic networks.

*networksFromContacts* Takes a contact sequence and creates sequence of binary or weighted networks.

*timeAggregate\_bin* Creates a binary undirected network from a dynamic network of  $nNodes$  nodes and encoded by *contactSequence*. Output network has an edge between node pairs which are connected at any time.

*thresholdMatDensity* Threshold a matrix by edge density.
